# Supplementary material for: Chinese University English Teachers’ Professional Learning through Academic Reading on Social Media—A Mixed-Methods Approach
Source: MDPI journal article supplement (doi:10.3390/bs12100390), 2022-10-12
Supplement: s1 [file s1]

## Supplementary Material

### The main items of the questionnaire of *Chinese university English teachers' professional learning through academic reading on social media- A mixed-methods approach*

#### Section 1: The experience of using social media for academic purposes

1. Have you ever read academic resources or information on social media (e.g., WeChat, Weibo, Facebook, and Twitter)? (If you do not have the experience of reading academic resources or information on social media, you can stop answering this questionnaire.)

☐ Yes

☐ No

2. On which social media do you usually read academic resources or information? (Choose one or more than one option)

☐ WeChat

☐ Weibo

☐ Facebook

☐ Twitter

☐ Zhihu

☐ Other \_\_\_\_\_

3. In the past month, how much time (in hours) did you spend reading academic resources and information on social media every day? \_\_\_\_\_

#### Section 2. Behavioral intentions and factors influencing intentions toward engagement with academic reading on social media

##### Perceived value of content knowledge (PVCK)

4. The content I read on social media can deepen my understanding of the subject-matter knowledge.

|                          |                          |                          |                          |                          |                          |                          |
|--------------------------|--------------------------|--------------------------|--------------------------|--------------------------|--------------------------|--------------------------|
| <input type="checkbox"/> |
| 1                        | 2                        | 3                        | 4                        | 5                        | 6                        | 7                        |

5. The content I read on social media helps me make different interpretations of subject-specific knowledge.

|                          |                          |                          |                          |                          |                          |                          |
|--------------------------|--------------------------|--------------------------|--------------------------|--------------------------|--------------------------|--------------------------|
| <input type="checkbox"/> |
| 1                        | 2                        | 3                        | 4                        | 5                        | 6                        | 7                        |

6. The content I read on social media can broaden my subject-matter knowledge.

|                          |                          |                          |                          |                          |                          |                          |
|--------------------------|--------------------------|--------------------------|--------------------------|--------------------------|--------------------------|--------------------------|
| <input type="checkbox"/> |
| 1                        | 2                        | 3                        | 4                        | 5                        | 6                        | 7                        |

**Perceived value of pedagogical content knowledge (PVPCK)**

7. The content I read on social media provides me with various teaching strategies.

|                          |                          |                          |                          |                          |                          |                          |
|--------------------------|--------------------------|--------------------------|--------------------------|--------------------------|--------------------------|--------------------------|
| <input type="checkbox"/> |
| 1                        | 2                        | 3                        | 4                        | 5                        | 6                        | 7                        |

8. The content I read on social media can help me better transfer knowledge to students.

|                          |                          |                          |                          |                          |                          |                          |
|--------------------------|--------------------------|--------------------------|--------------------------|--------------------------|--------------------------|--------------------------|
| <input type="checkbox"/> |
| 1                        | 2                        | 3                        | 4                        | 5                        | 6                        | 7                        |

9. The content I read on social media enables me to better carry out activities in classroom teaching.

|                          |                          |                          |                          |                          |                          |                          |
|--------------------------|--------------------------|--------------------------|--------------------------|--------------------------|--------------------------|--------------------------|
| <input type="checkbox"/> |
| 1                        | 2                        | 3                        | 4                        | 5                        | 6                        | 7                        |

**Perceived value of students' participation in the classroom (PVSPC)**

10. Using the content I read on social media in classroom teaching can lead to positive student feedback.

|                          |                          |                          |                          |                          |                          |                          |
|--------------------------|--------------------------|--------------------------|--------------------------|--------------------------|--------------------------|--------------------------|
| <input type="checkbox"/> |
| 1                        | 2                        | 3                        | 4                        | 5                        | 6                        | 7                        |

11. Using the content I read on social media in classroom teaching can help students better understand the content I teach.

|                          |                          |                          |                          |                          |                          |                          |
|--------------------------|--------------------------|--------------------------|--------------------------|--------------------------|--------------------------|--------------------------|
| <input type="checkbox"/> |
| 1                        | 2                        | 3                        | 4                        | 5                        | 6                        | 7                        |

12. Using the content I read on social media in classroom teaching can help students overcome learning difficulties.

|                          |                          |                          |                          |                          |                          |                          |
|--------------------------|--------------------------|--------------------------|--------------------------|--------------------------|--------------------------|--------------------------|
| <input type="checkbox"/> |
| 1                        | 2                        | 3                        | 4                        | 5                        | 6                        | 7                        |

**Intentions toward engagement with academic reading on social media (IEARSM)**

13. I will read articles and information related to my teaching on official accounts frequently.

|                          |                          |                          |                          |                          |                          |                          |
|--------------------------|--------------------------|--------------------------|--------------------------|--------------------------|--------------------------|--------------------------|
| <input type="checkbox"/> |
| 1                        | 2                        | 3                        | 4                        | 5                        | 6                        | 7                        |

14. I will follow the updates available on official accounts.

|                          |                          |                          |                          |                          |                          |                          |
|--------------------------|--------------------------|--------------------------|--------------------------|--------------------------|--------------------------|--------------------------|
| <input type="checkbox"/> |
| 1                        | 2                        | 3                        | 4                        | 5                        | 6                        | 7                        |

15. I will gather information related to my teaching and research on social media.

|                          |                          |                          |                          |                          |                          |                          |
|--------------------------|--------------------------|--------------------------|--------------------------|--------------------------|--------------------------|--------------------------|
| <input type="checkbox"/> |
| 1                        | 2                        | 3                        | 4                        | 5                        | 6                        | 7                        |

### **Section 3. Demographics**

Gender: \_\_\_\_\_

Your age: \_\_\_\_\_

Your years of teaching experience as a university English teacher: \_\_\_\_\_

Your university where currently you work in: \_\_\_\_\_
